# Supplementary material for: A lanthanide metal–organic framework (MOF-76) for adsorbing dyes and fluorescence detecting aromatic pollutants
Source: Royal Society of Chemistry journal article supplement (doi:10.1039/c5ra23681a), 2016-01-01
Supplement: c5ra23681a1.pdf [file c5ra23681a1.pdf]

# Supporting Information

## **A lanthanide metal–organic framework (MOF-76) for adsorbing dyes and fluorescence detecting aromatic pollutants**

Xiao Lian, Bing Yan\*

Department of Chemistry, Tongji University, Siping Road 1239, Shanghai 200092, China

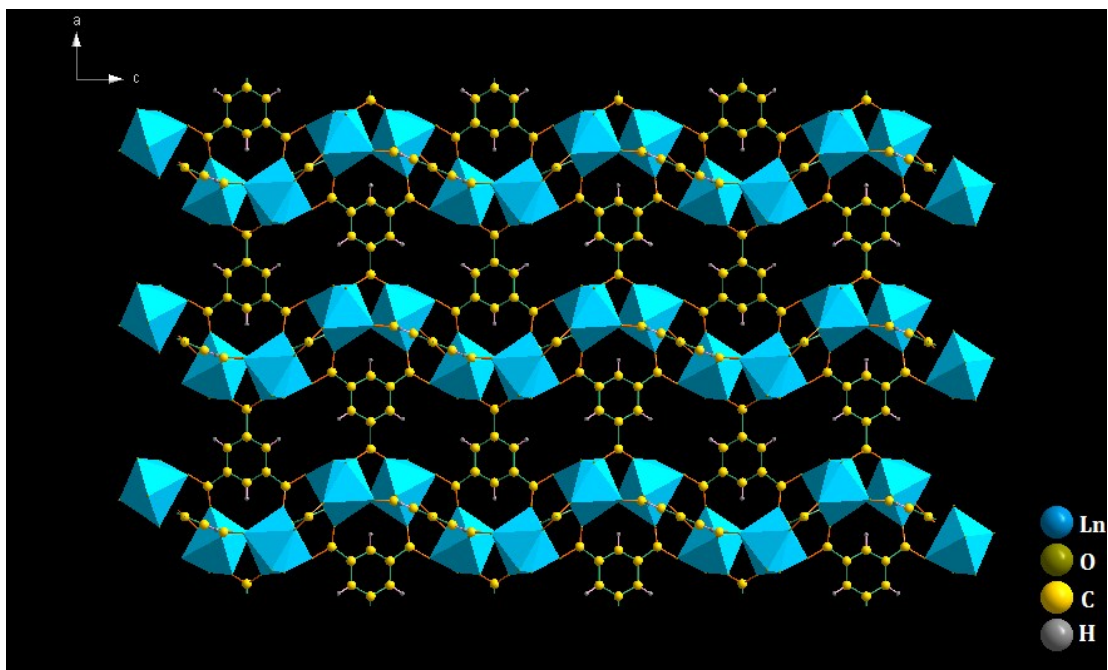

**Scheme S1.** The structure and typical coordination environment of MOF-76(Ln).

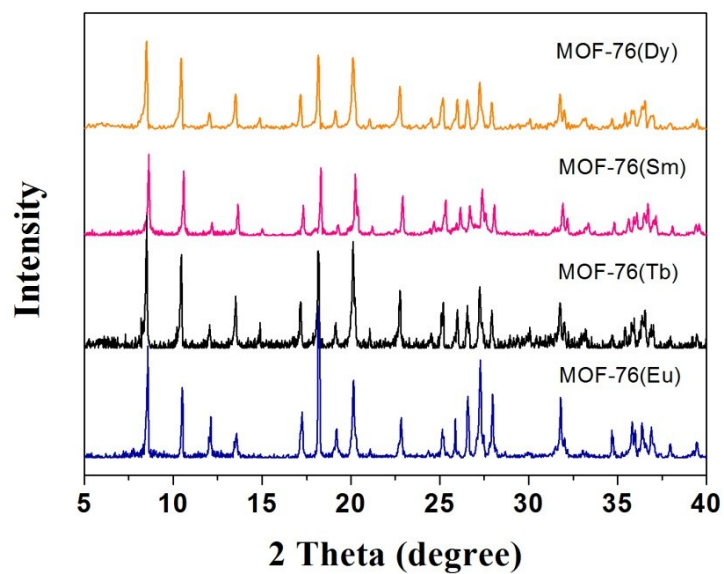

**Fig. S1** PXRD pattern of the as-synthesized MOF-76(Eu), MOF-76(Tb), MOF-76(Sm) and MOF-76(Dy).

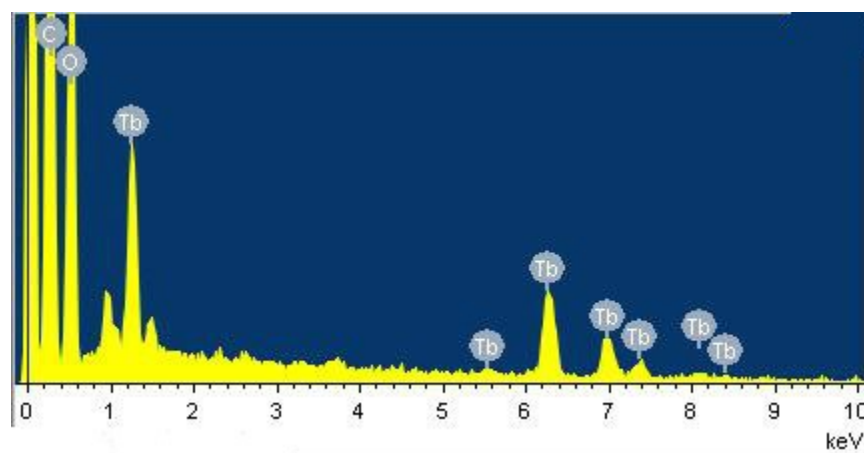

**Fig. S2** Energy dispersive analysis by X-rays (EDX) spectroscopy of MOF-76(Tb).

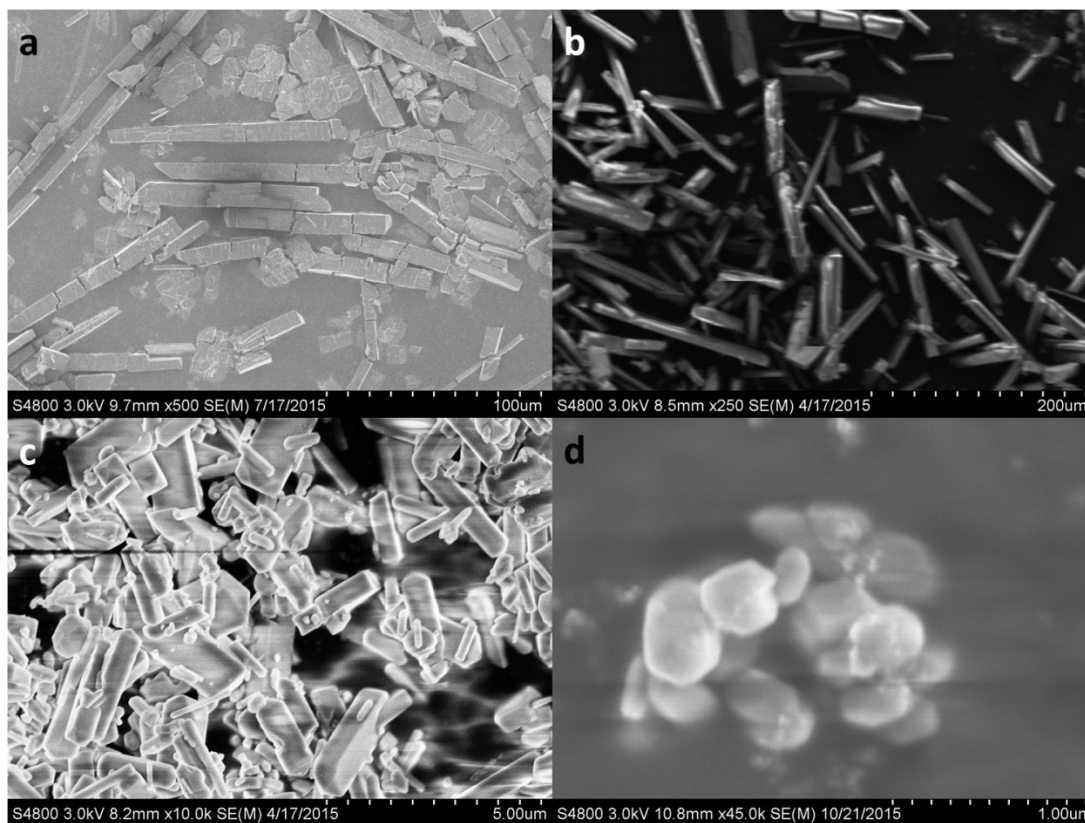

**Fig. S3** The selected SEM images of materials **1** (a-b), **2** (c) and **3** (d).

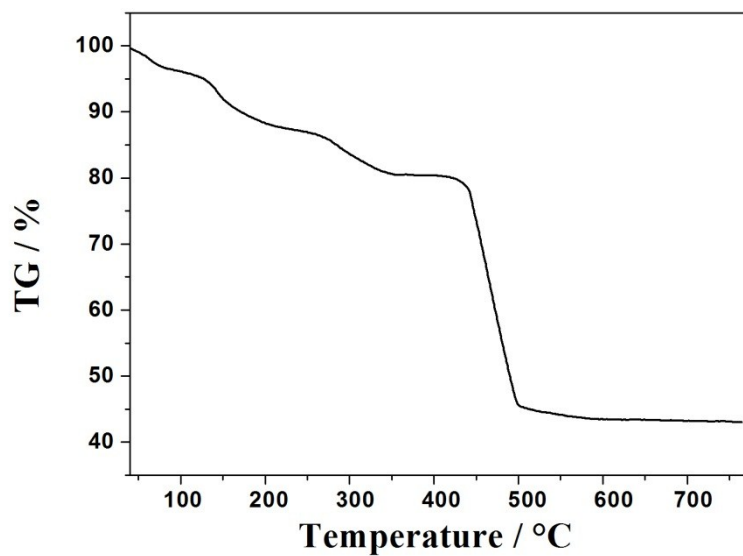

**Fig. S4** Thermal gravimetric analysis (TGA) of MOF-76(Tb).

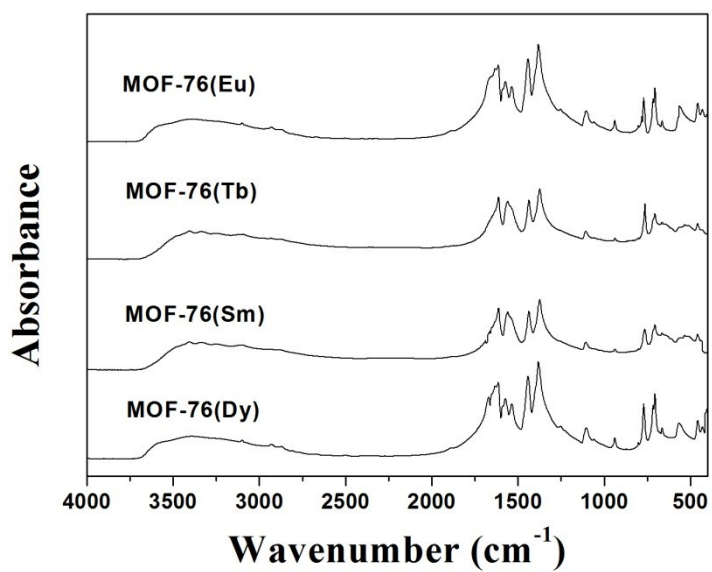

**Fig. S5** Fourier transform infrared spectra (FT-IR) of MOF-76(Eu), MOF-76(Tb), MOF-76(Sm) and MOF-76(Dy).

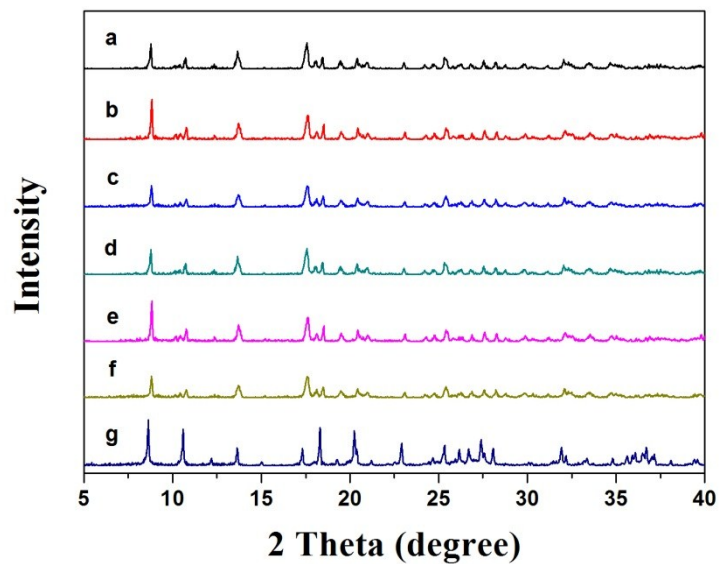

**Fig. S6** (a-f) PXR D patterns of the materials **3** after soaked in different dye solutions (methyl orange, methylene blue, rhodamine B, crystal violet, semixylenol orange, and basic red 2) for 48 h; (g) PXR D pattern of the original materials **3**.

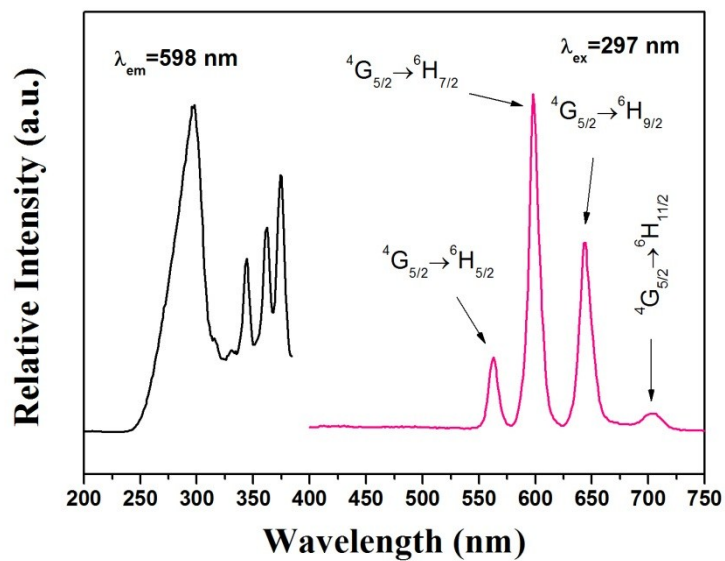

**Fig. S7** Excitation spectrum and emission spectrum of MOF-76(Sm).

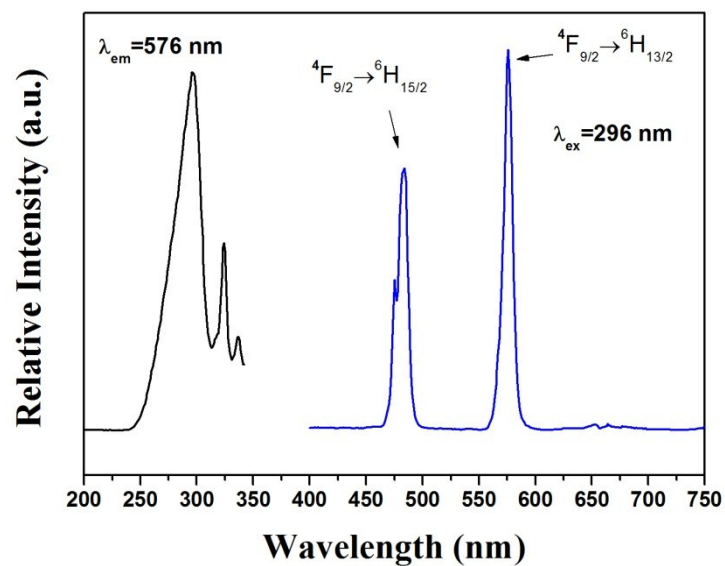

Fig. S8 Excitation spectrum and emission spectrum of MOF-76(Dy).

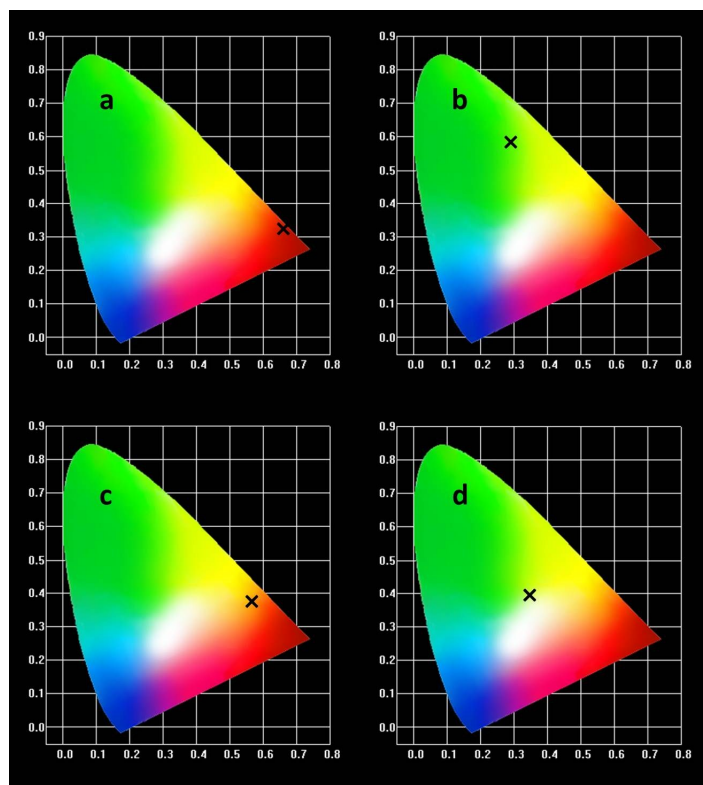

Fig. S9 CIE chromaticity diagram of (a) MOF-76(Eu); (b) MOF-76(Tb); (c) MOF-76(Sm); (d) MOF-76(Dy).

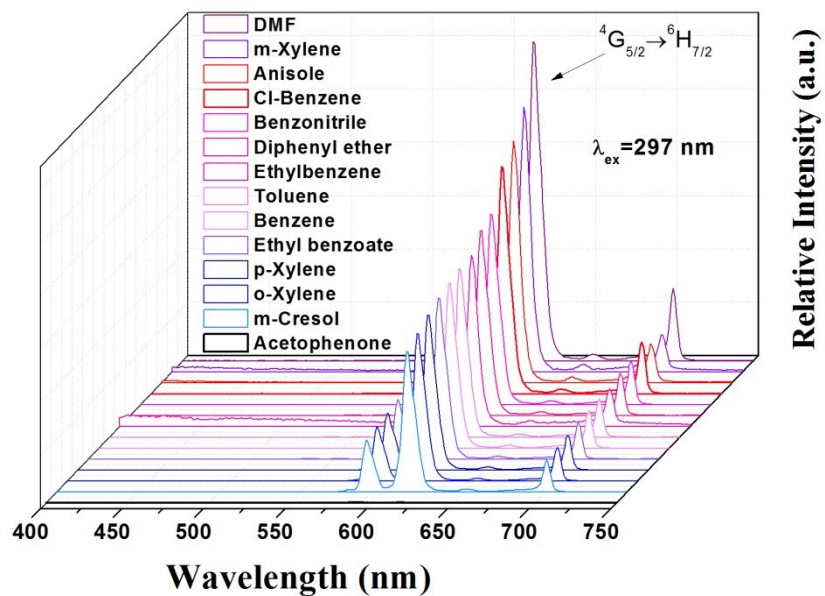

**Fig. S10** Emission spectra of MOF-76(Eu) introduced into various pure BTEX solvents when excited at 297 nm.

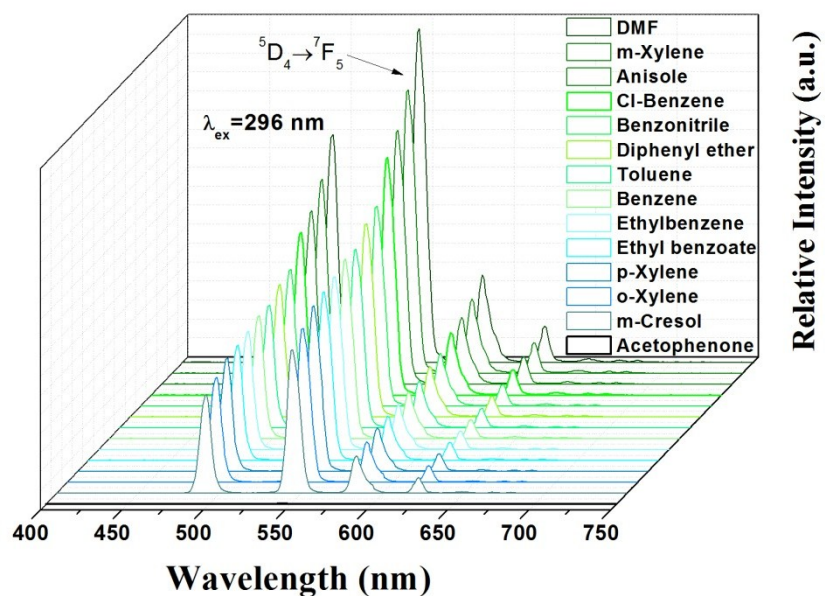

**Fig. S11** Emission spectra of MOF-76(Tb) introduced into various pure BTEX solvents when excited at 296 nm.

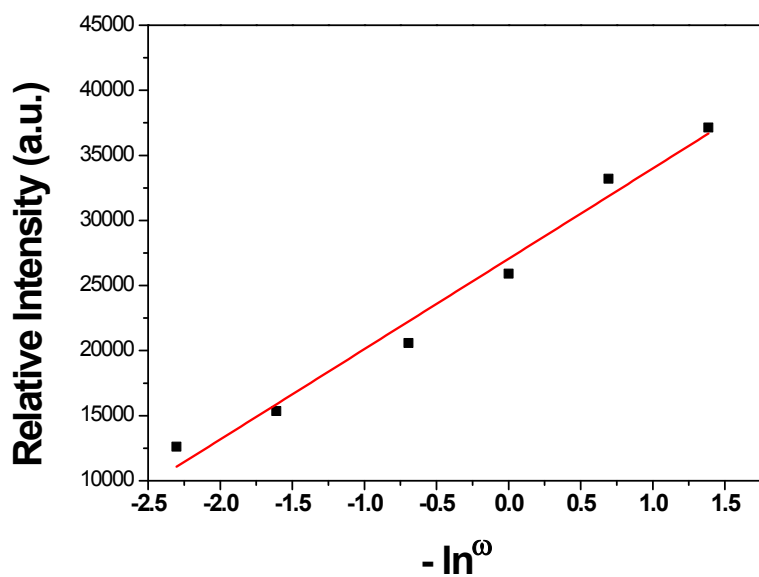

Fig. S12 The fitting curve of the emission intensity (545 nm) of MOF-76(Tb) vs. acetophenone content.

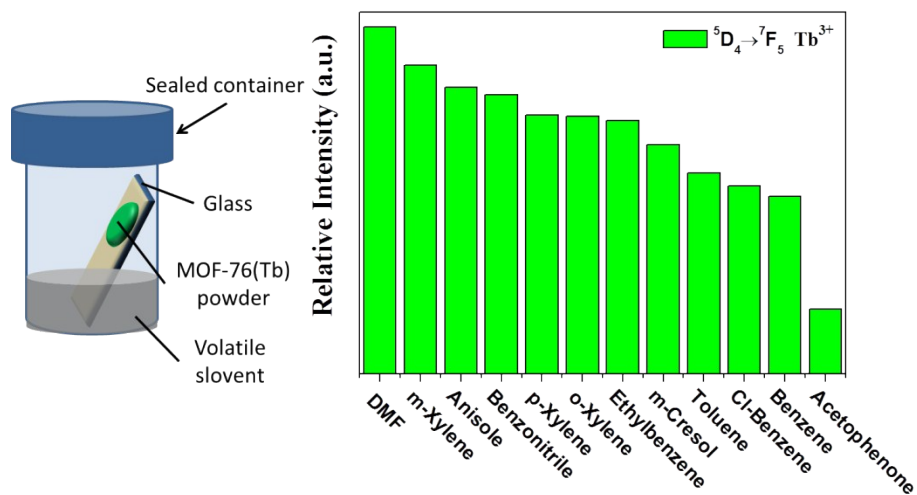

Fig. S13 The setup for sensing BTEX volatiles (left); the  ${}^5D_4 \rightarrow {}^7F_5$  transition intensity ratios from the emission spectra of MOF-76(Tb) after exposed to various volatile BTEX solvents for 1 h, and the excite wavelength is 296 nm (right).



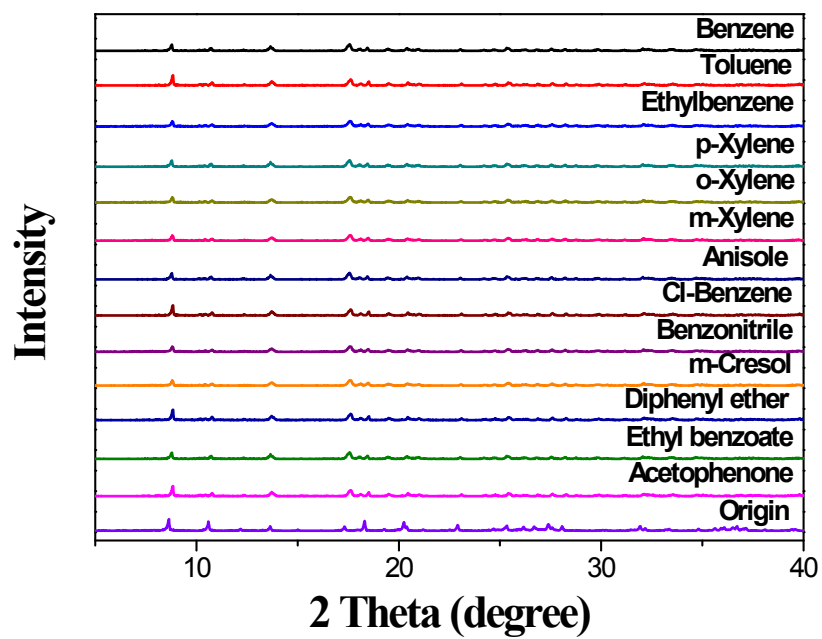

Fig. S14 PXRD patterns of the MOF-76(Tb) treated by various BTEX solvents.

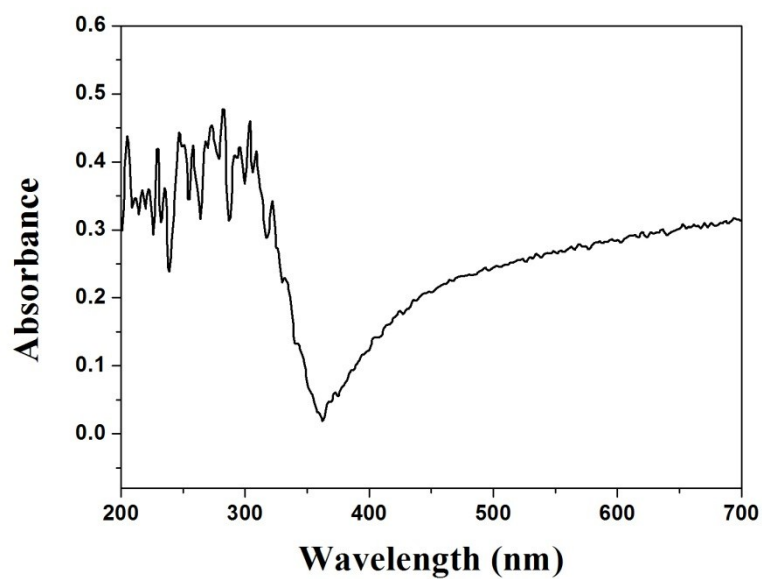

Fig. S15 Ultraviolet diffuse-reflectance spectra of 1,3,5-benzenetricarboxylic acid.

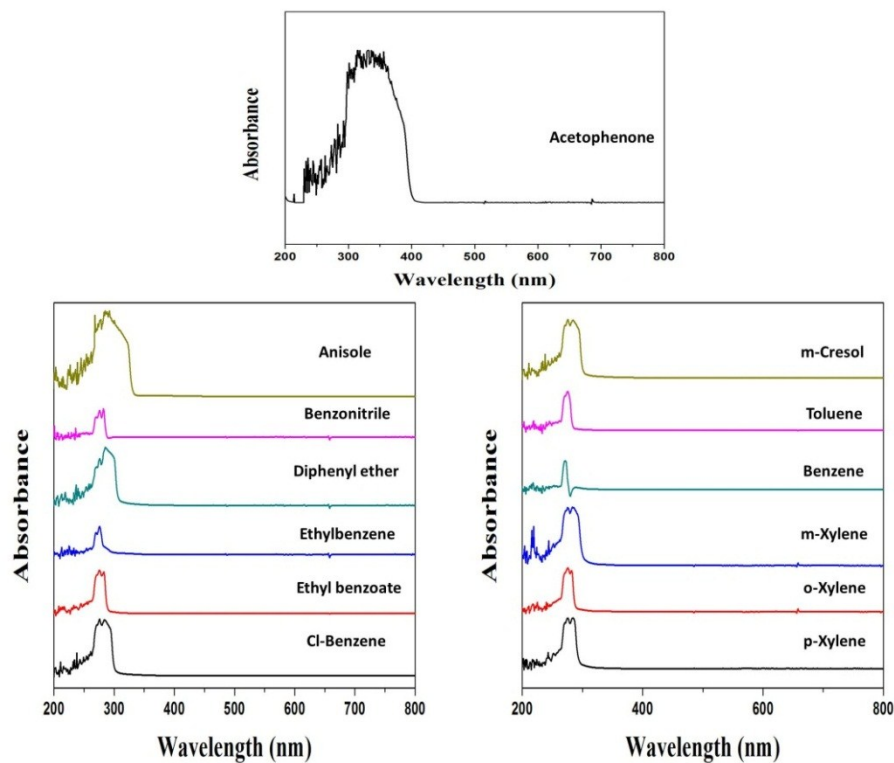

**Fig. S16** UV-vis absorption spectroscopy of different BTEX solvents.

**Table S1.** The luminescent data of MOF-76(Ln) materials.

|            | <i>Lifetime</i> ( $\mu$ s) | <i>Efficiency</i> (%) | <i>Excitation wavelength</i> (nm) |
|------------|----------------------------|-----------------------|-----------------------------------|
| MOF-76(Eu) | 1082                       | 55.6                  | 297                               |
| MOF-76(Tb) | 1719                       | 72.3                  | 296                               |
| MOF-76(Sm) | 204                        | 16.7                  | 297                               |
| MOF-76(Dy) | 231                        | 17.1                  | 296                               |

**Table S2.** Responses of luminescence lifetimes of MOF-76(Tb) towards various BTEX solvents.

| <i>BTEX solvents</i> | <i>Lifetime</i> ( $\mu$ s) |
|----------------------|----------------------------|
| Benzene              | 1586                       |
| Toluene              | 1569                       |
| Ethylbenzene         | 1503                       |
| p-Xylene             | 1523                       |
| o-Xylene             | 1506                       |
| m-Xylene             | 1556                       |
| Anisole              | 1593                       |
| Cl-Benzene           | 1540                       |
| Benzonitrile         | 1521                       |
| m-Cresol             | 1561                       |
| Diphenyl ether       | 1515                       |
| Ethyl benzoate       | 1494                       |
| Acetophenone         | 1518                       |
